# Supplementary material
Source: publisher site journal article supplement (https://www.spandidos-publications.com/5649/downloadSupplementary)
Supplement: Supplementary file 1 [file downloadSupplementary]

## Sheet: Sheet1
Table SI. Detailed list of all 73 genes assessed by Next-Generation Sequencing.
Gene	Full term
AKT1	AKT serine/threonine kinase 1
ALK	anaplastic lymphoma receptor tyrosine kinase
APC	APC regulator of WNT signaling pathway
AR	androgen receptor
BRAF	B-Raf proto-oncogene, serine/threonine kinase
CDK4	cyclin dependent kinase 4
CDKN2A	cyclin dependent kinase inhibitor 2A
CTNNB1	catenin beta 1
EGFR	epidermal growth factor receptor
ERBB2	erb-b2 receptor tyrosine kinase 2
ESR1	estrogen receptor 1
FBXW7	F-box and WD repeat domain containing 7
FGFR2	fibroblast growth factor receptor 2
FGFR3	fibroblast growth factor receptor 3
GNA11	G protein subunit alpha 11
HRAS	HRas proto-oncogene, GTPase
IDH1	isocitrate dehydrogenase (NADP(+)) 1, cytosolic
JAK2	Janus kinase 2
KIT	KIT proto-oncogene receptor tyrosine kinase
KRAS	KRAS proto-oncogene, GTPase
MAP2K1	mitogen-activated protein kinase kinase 1
MET	MET proto-oncogene, receptor tyrosine kinase
NRAS	NRAS proto-oncogene, GTPase
PDGFRA	platelet-derived growth factor receptor alpha
PIK3CA	phosphatidylinositol-4,5-bisphosphate 3-kinase catalytic subunit alpha
PTEN	phosphatase and tensin homolog
RAF1	Raf-1 proto-oncogene, serine/threonine kinase
RET	ret proto-oncogene
ROS1	ROS proto-oncogene 1, receptor tyrosine kinase
TP53	tumor protein p53
NTRK1	neurotrophic receptor tyrosine kinase 1
ATM	ATM serine/threonine kinase
BRCA1	BRCA1 DNA repair associated
BRCA2	BRCA2 DNA repair associated
BRIP1	BRCA1 interacting protein C-terminal helicase 1
CCND1	cyclin D1
CD274	CD274 molecule
CDK6	cyclin dependent kinase 6
CHEK2	checkpoint kinase 2
CRKL	CRK like proto-oncogene, adaptor protein
DDR2	discoidin domain receptor tyrosine kinase 2
EPCAM	epithelial cell adhesion molecule
FGFR1	fibroblast growth factor receptor 1
FLT3	fms related tyrosine kinase 3
GNAQ	G protein subunit alpha q
GNAS	GNAS complex locus
MAP2K2	mitogen-activated protein kinase kinase 2
MLH1	mutL homolog 1
MSH2	mutS homolog 2
MSH6	mutS homolog 6
NF1	neurofibromin 1
PALB2	partner and localizer of BRCA2
PDCD1LG2	programmed cell death 1 ligand 2
PMS2	PMS1 homolog 2, mismatch repair system component
PTCH1	patched 1
RAD51C	RAD51 paralog C
RAD51D	RAD51 paralog D
RB1	RB transcriptional corepressor 1
SMARCA4	SWI/SNF related, matrix associated, actin dependent regulator of chromatin, subfamily a, member 4
SMO	smoothened, frizzled class receptor
STK11	serine/threonine kinase 11
TSC1	tuberous sclerosis 1
TSC2	tuberous sclerosis 2
VHL	von Hippel-Lindau tumor suppressor
BCL2L11	BCL2 like 11
CD74	CD74 molecule
DPYD	dihydropyrimidine dehydrogenase
EZR	ezrin
TERT	telomerase reverse transcriptase
CYP2D6	cytochrome P450 family 2 subfamily D member 6
UGT1A1	UDP glucuronosyltransferase family 1 member A1
MTOR	mechanistic target of rapamycin kinase
IDH2	isocitrate dehydrogenase (NADP(+)) 2, mitochondrial
